# Supplementary material for: Interactions between Beer Compounds and Human Salivary Proteins: Insights toward Astringency and Bitterness Perception
Source: MDPI journal article supplement (doi:10.3390/molecules28062522), 2023-03-09
Supplement: s1 [file s1]

**Table S1.** Phenolic and non-phenolic compounds “tentatively” identified in four Super Bock beers, after Solid Phase Extraction (SPE), by LC-MS analysis.

| Compound | Name                       | t <sub>R</sub><br>(min) | [M-H] <sup>-</sup> | MS <sup>2</sup> (-) (m/z)                                                                    | [M-H] <sup>+</sup> | MS <sup>2</sup> (+) (m/z)                                                                    |
|----------|----------------------------|-------------------------|--------------------|----------------------------------------------------------------------------------------------|--------------------|----------------------------------------------------------------------------------------------|
| 1        | 2-Hydroxycinnamic acid     | 4.86                    | 162.84             | 162.84 (100)                                                                                 | n.d.               | n.d.                                                                                         |
| 2        | Quinic acid or Scopolin    | 5.18                    | 191.06             | 191.06 (100)                                                                                 | n.d.               | n.d.                                                                                         |
| 3        | 7-Hydroxycoumarin          | 5.53                    | 160.84             | 160.84 (100)                                                                                 | n.d.               | n.d.                                                                                         |
| 4        | 4-Hydroxyquinoline         | 5.64                    | n.d.               | n.d.                                                                                         | 146.12             | 146 (100)                                                                                    |
| 5        | Adenine                    | 5.71                    | n.d.               | n.d.                                                                                         | 136.06             | 136.06 (100)                                                                                 |
| 6        | 8-Hydroxyquinoline         | 6.11                    | n.d.               | n.d.                                                                                         | 146.09             | 146 (100); 128.03 (11.12); 104.07 (15.80); 87.06 (50.43); 86.06 (33.67)                      |
| 7        | D-Sorbitol                 | 6.33                    | n.d.               | n.d.                                                                                         | 189.08             | 189.08 (11.92); 129.05 (52.51); 111.04 (20.77); 99.04 (23.17); 85.03 (14.90); 69.03 (100)    |
| 8        | Cis-resveratrol            | 6.71                    | n.d.               | n.d.                                                                                         | 229.15             | 229.15 (100); 142.09 (8.60); 70.07 (2.17)                                                    |
| 9        | Citric acid                | 6.76                    | 191.02             | 191.02 (10.68); 111.01 (100); 87.01 (46.20); 86.03 (1.18); 85.03 (30.38)                     | n.d.               | n.d.                                                                                         |
| 10       | Pipecolic acid             | 7.17                    | 128.04             | 128.04 (100)                                                                                 | 130.05             | 130.05 (28.32); 84.04 (100)                                                                  |
| 11       | Linoleic acid              | 7.36                    | 279.04             | 279.23 (1.73); 243.06 (100); 111.02 (62.70); 110.02 (42.53)                                  | n.d.               | n.d.                                                                                         |
| 12       | Vanillin                   | 7.54                    | 151.03             | 151.03 (100); 108.02 (19.64)                                                                 | 153.04             | 153.04 (100); 136 (2.38); 110.03 (11.29)                                                     |
| 13       | Adenosine                  | 7.73                    | n.d.               | n.d.                                                                                         | 136.06             | 314.09 (2.76); 136.06 (100)                                                                  |
| 14       | Tyrosine                   | 8.32                    | n.d.               | n.d.                                                                                         | 182.08             | 182.08 (4.70); 165.05 (50.33); 147.04 (20.02); 136.08 (100); 123.04 (34.31)                  |
| 15       | Leucine                    | 9.05                    | n.d.               | n.d.                                                                                         | 132.1              | 132.10 (4.55); 87.10 (5.39); 86.10 (100)                                                     |
| 16       | Guanosine                  | 9.5                     | 282.08             | 282.08 (11.99); 150.04 (100)                                                                 | 284.1              | 152.06 (100)                                                                                 |
| 17       | Hordenine                  | 10.92                   | n.d.               | n.d.                                                                                         | 166.12             | 166.12 (29.14); 122.07 (7.04); 121.06 (100)                                                  |
| 18       | Adenine dimer              | 12.44                   | n.d.               | n.d.                                                                                         | 282.12             | 136 (100)                                                                                    |
| 19       | 3-O-Acetyldiosgenin trimer | 12.85                   | n.d.               | n.d.                                                                                         | 1387.96            | 325.11 (100); 289.09 (9.45)                                                                  |
| 20       | Uridine                    | 13.13                   | n.d.               | n.d.                                                                                         | 245.1              | 181 .10 (100); 125.07 (3)                                                                    |
| 21       | Beta-carboline             | 13.31                   | n.d.               | n.d.                                                                                         | 169.1              | 170.10 (8.73); 169 (100); 141 (4.75)                                                         |
| 22       | 1-Methyladenosine          | 13.94                   | n.d.               | n.d.                                                                                         | 282.12             | 282.12 (6.32); 150.08 (100)                                                                  |
| 23       | L-Phenylalanine            | 14.38                   | 164.07             | 164.07 (60.97); 148.05 (7.91); 147.05 (100)                                                  | 166.09             | 166.09 (4.25); 149.06 (1.80); 121.08 (7.44); 120.08 (100); 107.05 (1.63); 103.05 (1.61)      |
| 24       | Xanthohumol                | 14.69                   | 353.15             | 353.15 (10.08); 239.09 (10.50); 238.12 (22.80); 238.08 (100); 126.02 (36.85); 114.06 (55.46) | 355.16             | 240.07 (9.72); 227.10 (10.33); 212.10 (10.68); 129.07 (30.47); 116.07 (100)                  |
| 25       | Vitamin B5                 | 15.45                   | 218.1              | 218.10 (25.49); 146.08 (100)                                                                 | 220.12             | 220.12 (60.57); 202.11 (100); 184.10 (82.70); 142.09 (24.50); 116.03 (51.60); 103.07 (30.05) |
| 26       | Coumarin 106               | 16.28                   | n.d.               | n.d.                                                                                         | 282.19             | 283.20 (13.84); 282.19 (100); 195.11 (64.36)                                                 |
| 27       | Quercetin dimer            | 17.15                   | 602.13             | 602.12 (42.14); 490.10 (36.49); 362.05 (42.01); 225.02 (65.03); 111.02 (100)                 | 604.14             | 506.60 (0.43); 357.15 (1.78); 227.03 (0.54); 152.06 (100)                                    |
| 28       | Adenosine (267)            | 17.32                   | 326.14             | 282.11 (54.75); 238.12 (55.48); 167.05 (100); 114.06 (40.33)                                 | n.d.               | n.d.                                                                                         |
| 29       | Apiin                      | 18.67                   | 563.1              | 563.10 (13.21); 451.08 (11.85); 225.02 (10.86); 111.02 (100)                                 | n.d.               | n.d.                                                                                         |
| 30       | Caffeine                   | 19.18                   | n.d.               | n.d.                                                                                         | 195.11             | 195.11 (100)                                                                                 |
| 31       | L-Tryptophan               | 19.49                   | n.d.               | n.d.                                                                                         | 227.18             | 227.18 (100); 209.16 (21.07); 114.09 (14.48)                                                 |

|    |                                                  |       |        |                                                                                                              |        |                                                                                                              |
|----|--------------------------------------------------|-------|--------|--------------------------------------------------------------------------------------------------------------|--------|--------------------------------------------------------------------------------------------------------------|
| 32 | Gallo-catechin                                   | 20.46 | 613.18 | 613.18 (3.50); 289.07 (100); 245.08 (15.88); 137.02 (16.94)                                                  | n.d.   | n.d.                                                                                                         |
| 33 | Resveratrol                                      | 21.67 | 227.1  | 227.10 (49.76); 183.11 (100)                                                                                 | 229.12 | 229.12 (5.26); 183.11 (100); 118.09 (81.35); 116.07 (52.74)                                                  |
| 34 | 5-O-Caffeoylquinic acid<br>(neochlorogenic acid) | 21.93 | 353.09 | 353.09 (1.60); 191.06 (100); 179.04 (75.26); 135.05 (19.31)                                                  | n.d.   | n.d.                                                                                                         |
| 35 | Soyasapogenol A                                  | 22.1  | n.d.   | n.d.                                                                                                         | 439.22 | 439.22 (100); 277.17 (22.46); 260.14 (15.48); 147.04 (75.39)                                                 |
| 36 | 4-Methylumbelliferyl<br>glucuronide              | 22.37 | 351.13 | 207.09 (100); 99.05 (99.40)                                                                                  | n.d.   | n.d.                                                                                                         |
| 37 | Adenine                                          | 24.21 | n.d.   | n.d.                                                                                                         | 136.06 | 298.10 (1.13); 136.06 (100)                                                                                  |
| 38 | L-Tryptophan                                     | 25.19 | n.d.   | n.d.                                                                                                         | 188.07 | 188.07 (29.78); 146.06 (100); 144.08 (20.86)                                                                 |
| 39 | L-Glutamine dimer                                | 25.61 | 291.1  | 291.10 (22.94); 247.11 (17.84); 141.07 (10.47); 127.05 (100); 119.05 (10.61); 109.04 (13.36)                 | n.d.   | n.d.                                                                                                         |
| 40 | L-Glutamine                                      | 25.92 | n.d.   | n.d.                                                                                                         | 146.06 | 146.06 (100)                                                                                                 |
| 41 | Naringenin                                       | 28.98 | n.d.   | n.d.                                                                                                         | 273.13 | 273.13 (79.26); 255.12 (97.56); 213.10 (15.57); 147.04 (80.69); 127.10 (100); 110.07 (22.07)                 |
| 42 | Feruloylputrescine                               | 30.7  | n.d.   | n.d.                                                                                                         | 265.15 | 265.15 (3.79); 248.13 (5.65); 177.05 (100)                                                                   |
| 43 | 3-O-Caffeoylquinic acid<br>(chlorogenic acid)    | 31.79 | 353.09 | 191.06 (100)                                                                                                 | n.d.   | n.d.                                                                                                         |
| 44 | 4-O-Caffeoylquinic acid                          | 34.7  | 353.09 | 353.09 (1.12); 191.06 (47.02); 179.04 (80.66); 173.05 (100); 135.05 (26.50)                                  | n.d.   | n.d.                                                                                                         |
| 45 | Isoxanthohumol                                   | 35.46 | 353.18 | 353.09 (29.68); 335.17 (18.48); 207.06 (100); 147.12 (12.78)                                                 | n.d.   | n.d.                                                                                                         |
| 46 | Met-coumaroylagmatine<br>hexoside                | 35.9  | n.d.   | n.d.                                                                                                         | 453.22 | 453.22 (25.39); 425.22 (13.96); 372.19 (11.57); 291.16 (100); 157.11 (9.09); 145.05 (5.94); 127.04 (8.56)    |
| 47 | Coumaroylagmatine                                | 36.28 | 275.15 | 275.15 (11.22); 233.13 (20.66); 119.05 (100)                                                                 | 277.17 | 277.17 (91.19); 260.14 (36.35); 2218.12 (20.04); 147.04 (100); 114.10 (43.36)                                |
| 48 | Feruloylagmatine                                 | 40.58 | n.d.   | n.d.                                                                                                         | 307.16 | 307.18 (61.19); 290.15 (15.99); 177.05 (100); 114.10 (19.74)                                                 |
| 49 | Pyroglutamyl-Isoleucine                          | 41.32 | 241.12 | 241.12 (58.76); 197.13 (100); 141.10 (9.04)                                                                  | 243.14 | 243.14 (4.85); 197.13 (53.10); 132.10 (100)                                                                  |
| 50 | (-)-Epicatechin                                  | 41.65 | n.d.   | n.d.                                                                                                         | 292.15 | 291.06 (100); 283.15 (17.63); 265.08 (27.46); 173.10 (30.69); 147.12 (98.63); 113.07 (38.67)                 |
| 51 | Sinapoylagmatine                                 | 42.72 | n.d.   | n.d.                                                                                                         | 337.19 | 337.19 (44.28); 320.16 (8.33); 207.07 (100); 114.10 (12.74)                                                  |
| 52 | Cyclo(proline-leucine)                           | 43.6  | n.d.   | n.d.                                                                                                         | 211.14 | 211.14 (100)                                                                                                 |
| 53 | Di-caffeoyl spermidine                           | 43.86 | 468.25 | 468.25 (62.41); 424.26 (29.44); 278.19 (27.68); 244.13 (13.91); 240.14 (12.47); 145.06 (99.22); 127.05 (100) | 470.26 | 246.15 (12.84); 147.08 (100); 130.05 (51.26)                                                                 |
| 54 | 4-Hydroxycinnamic acid (4-<br>Coumaric acid)     | 51.6  | 163.04 | 163.04 (14.43); 119.05 (100)                                                                                 | n.d.   | n.d.                                                                                                         |
| 55 | Esculin or 6-Prenylnaringenin                    | 53.67 | 338.17 | 338.17 (11.12); 294.18 (29.15); 223.11 (89.55); 180.10 (11.64); 114.06 (100)                                 | n.d.   | n.d.                                                                                                         |
| 56 | 8-Prenylnaringenin                               | 54.24 | 338.17 | 338.17 (11.12); 294.18 (29.15); 223.11 (89.55); 180.10 (11.64); 114.06 (100)                                 | 340.19 | 197.13 (22.04); 116.07 (100); 86.10 (10.32)                                                                  |
| 57 | Leucylvaline                                     | 54.74 | n.d.   | n.d.                                                                                                         | 344.25 | 231.17 (11.06); 185.16 (76.77); 86.10 (100); 72.08 (36.94)                                                   |
| 58 | Quercetin                                        | 55.3  | n.d.   | n.d.                                                                                                         | 303.16 | 303.16 (66.58); 291.06 (57.10); 273.64 (42.62); 265.09 (35.50); 211.12 (100); 185.14 (43.62); 114.07 (32.63) |
| 59 | Diferuloylputrescine                             | 55.91 | n.d.   | n.d.                                                                                                         | 342.2  | 291.07 (51.08); 265.09 (100); 115.09 (14.81)                                                                 |
| 60 | Glutamyltyrosine                                 | 56.21 | n.d.   | n.d.                                                                                                         | 311.1  | 311.10 (100)                                                                                                 |
| 61 | 4-Feruloylquinic acid                            | 58.15 | n.d.   | n.d.                                                                                                         | 366.2  | 367.21 (0.89); 173.13 (100)                                                                                  |
| 62 | Lupulone                                         | 61.91 | 413.22 | 395.21 (20.88); 338.17 (18.79); 337.17 (100); 195.07 (16.07)                                                 | n.d.   | n.d.                                                                                                         |

n.d. = not detected

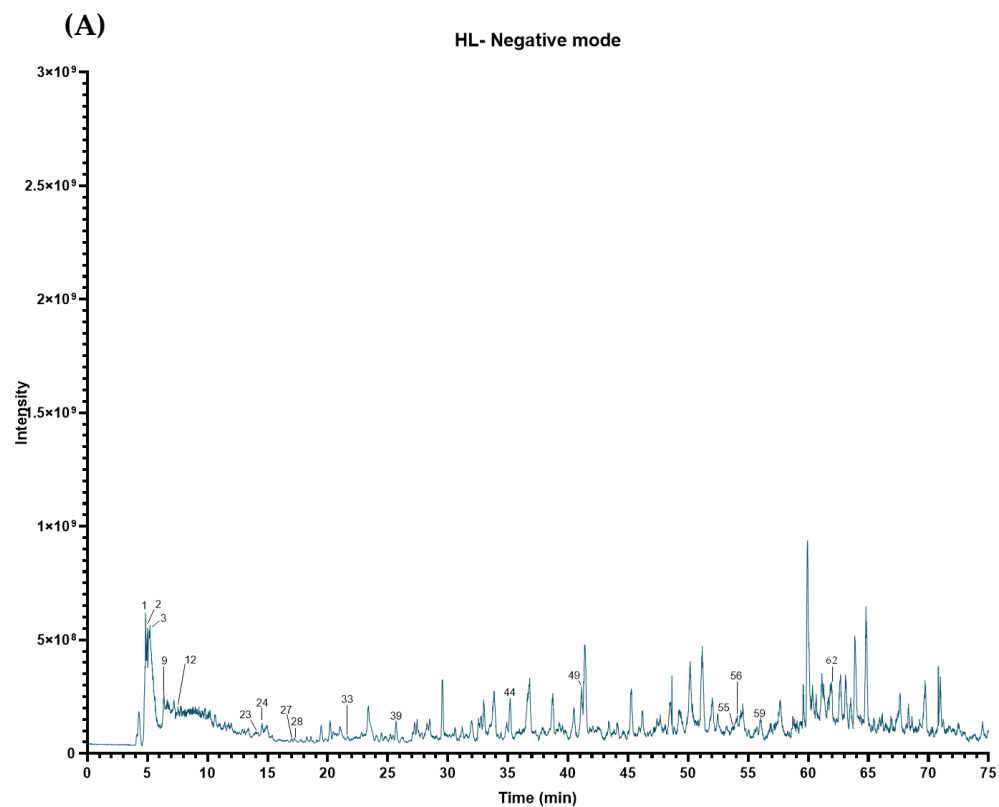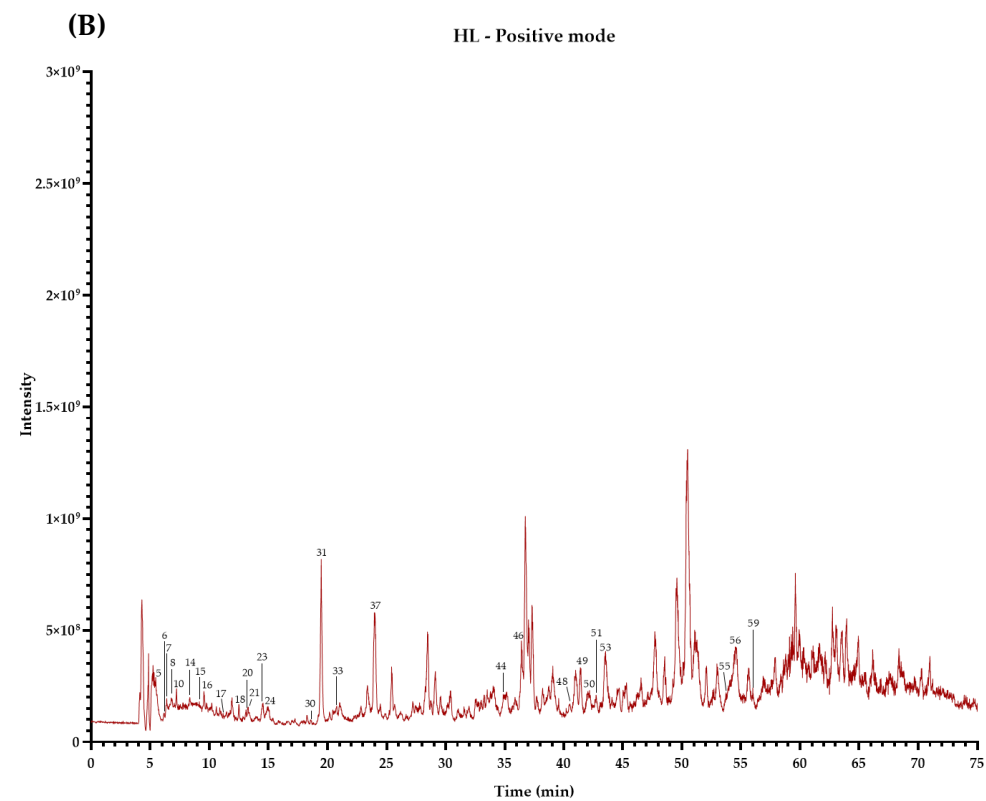

**Figure S1.** Total ion current (TIC) profile of Hoppy Lager (HL) beer in (A) negative and (B) positive mode, obtained by LC-MS analysis. Superscript numbers represent the compounds putatively identified in this beer.

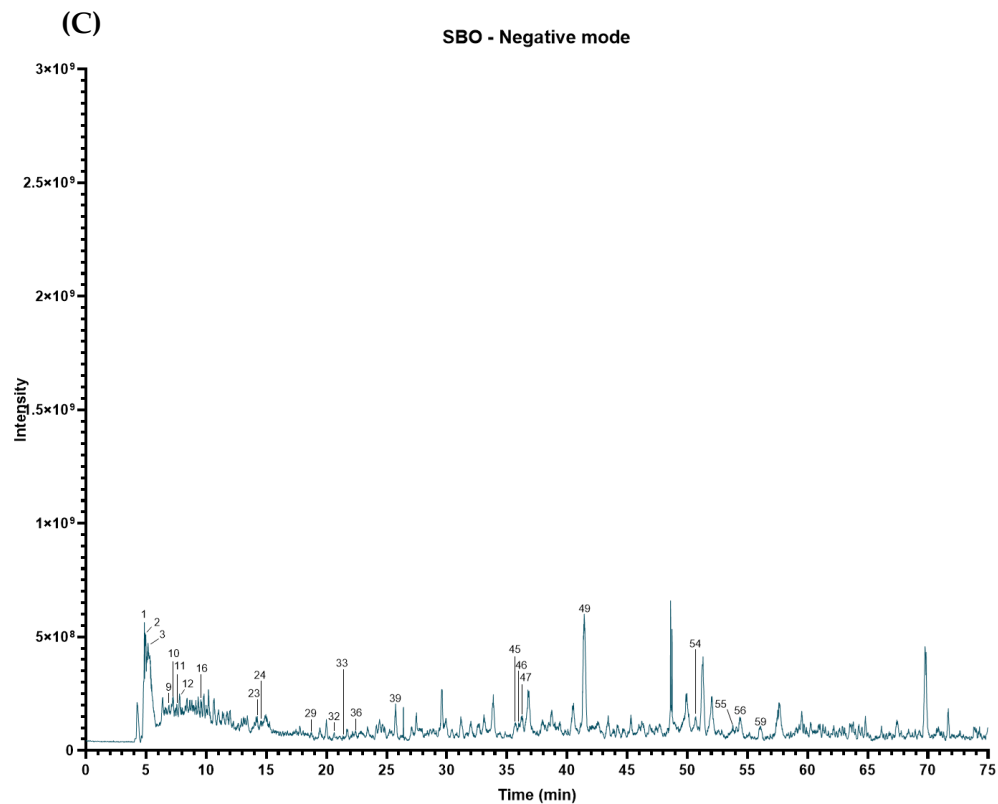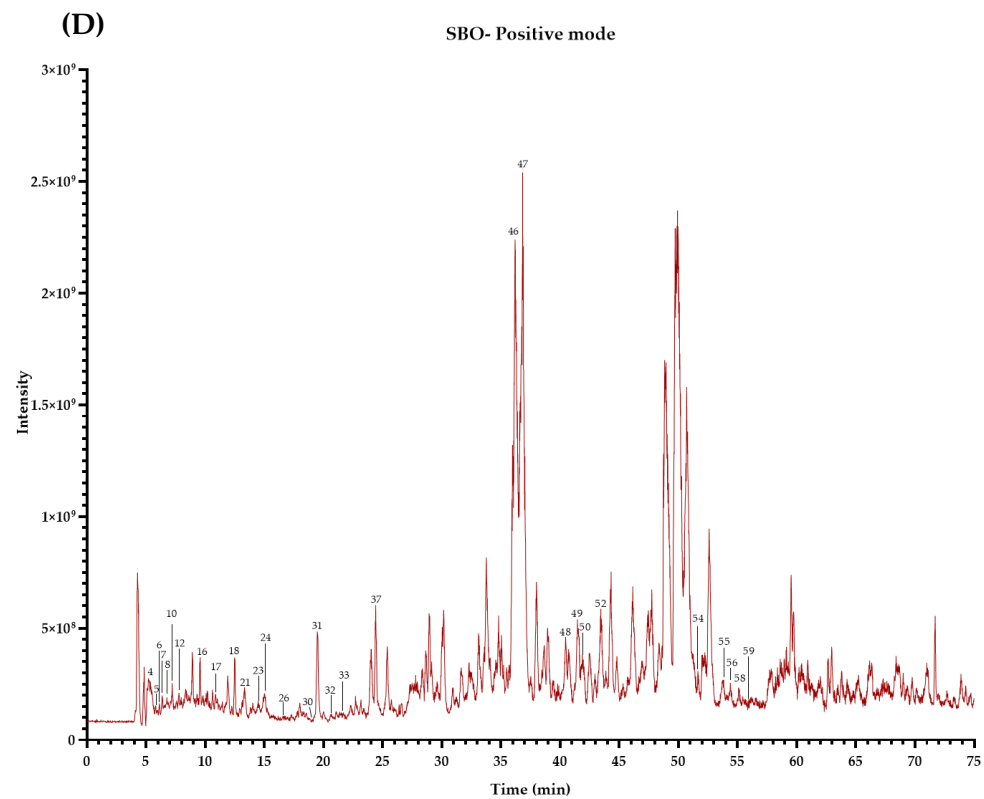

**Figure S1.** Total ion current (TIC) profile of Super Bock Original (SBO) beer in (C) negative and (D) positive mode, obtained by LC-MS analysis. Superscript numbers represent the compounds putatively identified in this beer.

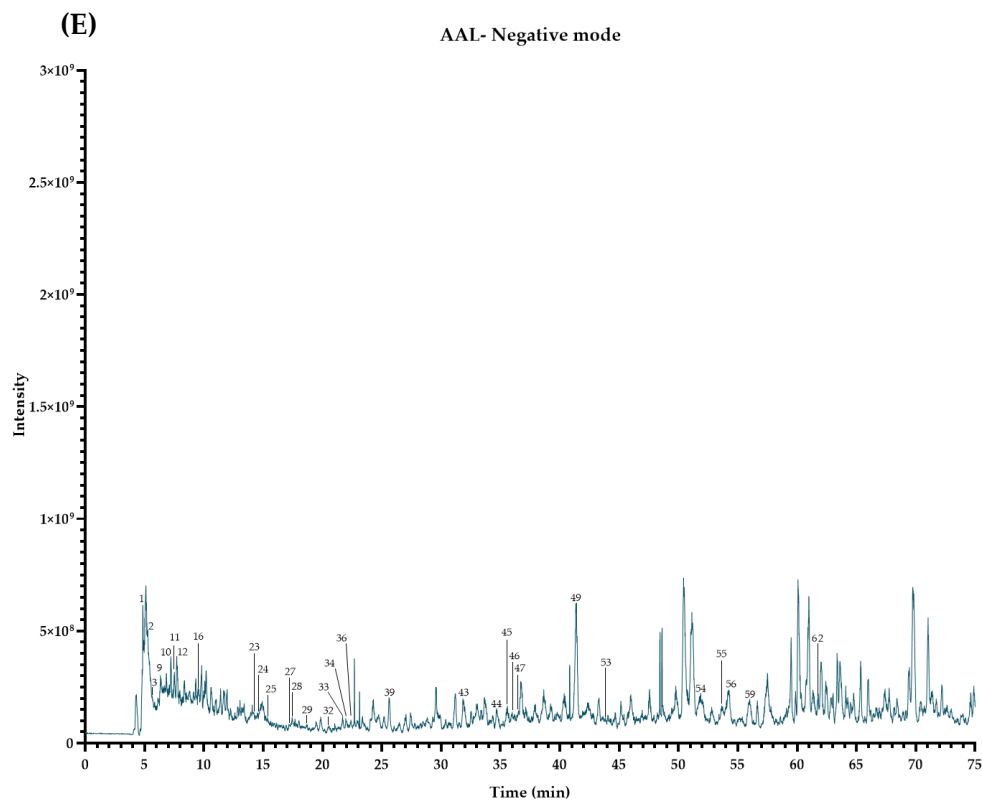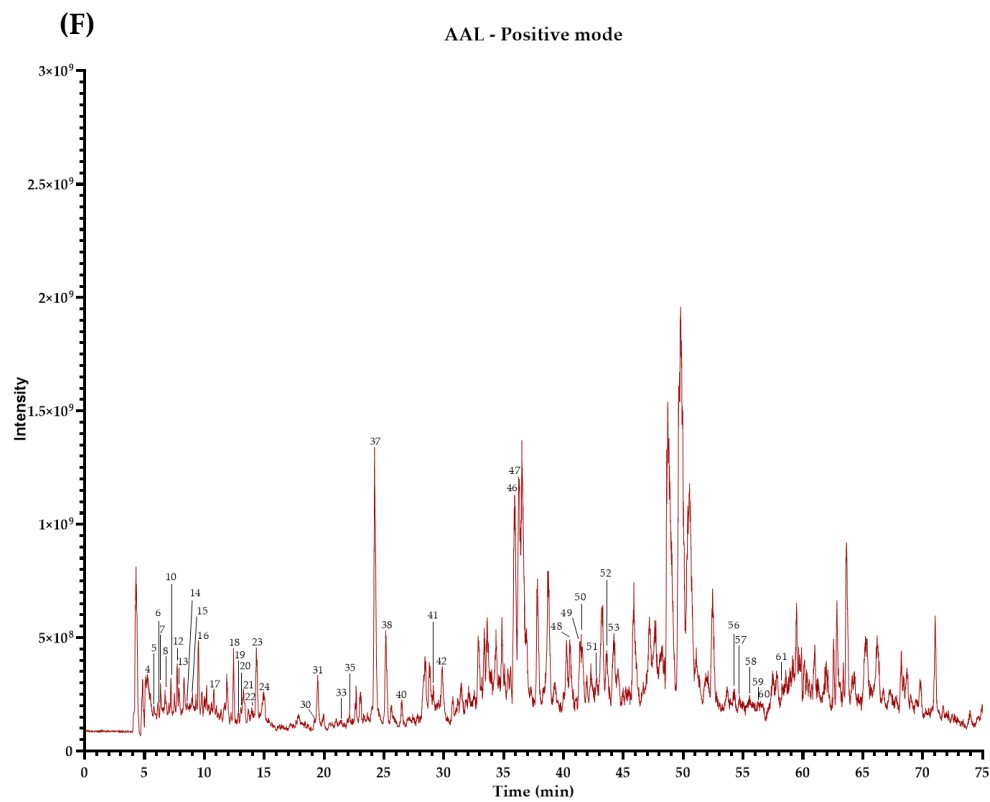

**Figure S1.** Total ion current (TIC) profile of American Amber Lager (AAL) beer in (E) negative and (F) positive mode, obtained by LC-MS analysis. Superscript numbers represent the compounds putatively identified in this beer.

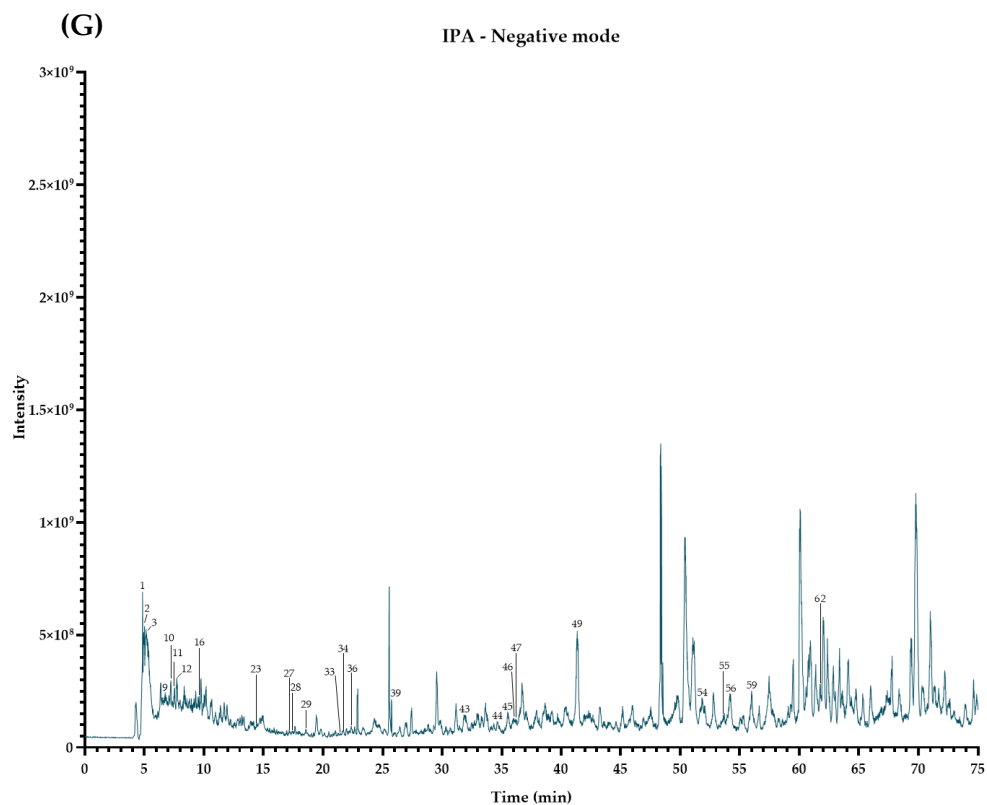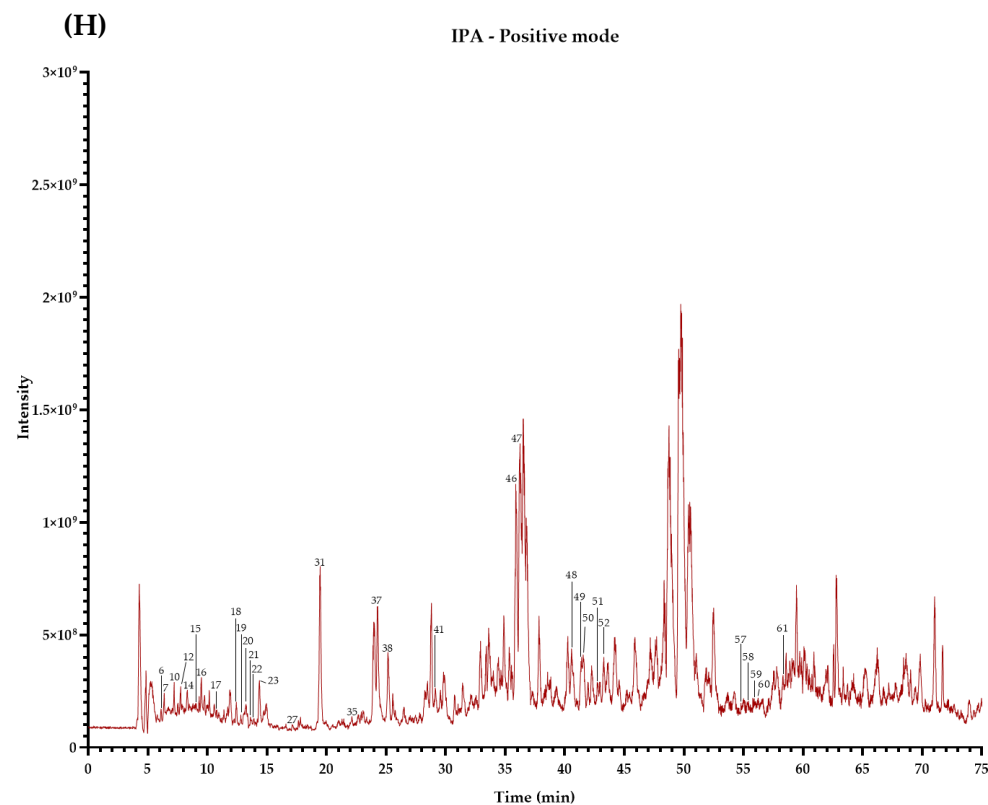

**Figure S1.** Total ion current (TIC) profile of India Pale Ale (IPA) beer in (G) negative and (H) positive mode, obtained by LC-MS analysis. Superscript numbers represent the compounds putatively identified in this beer.

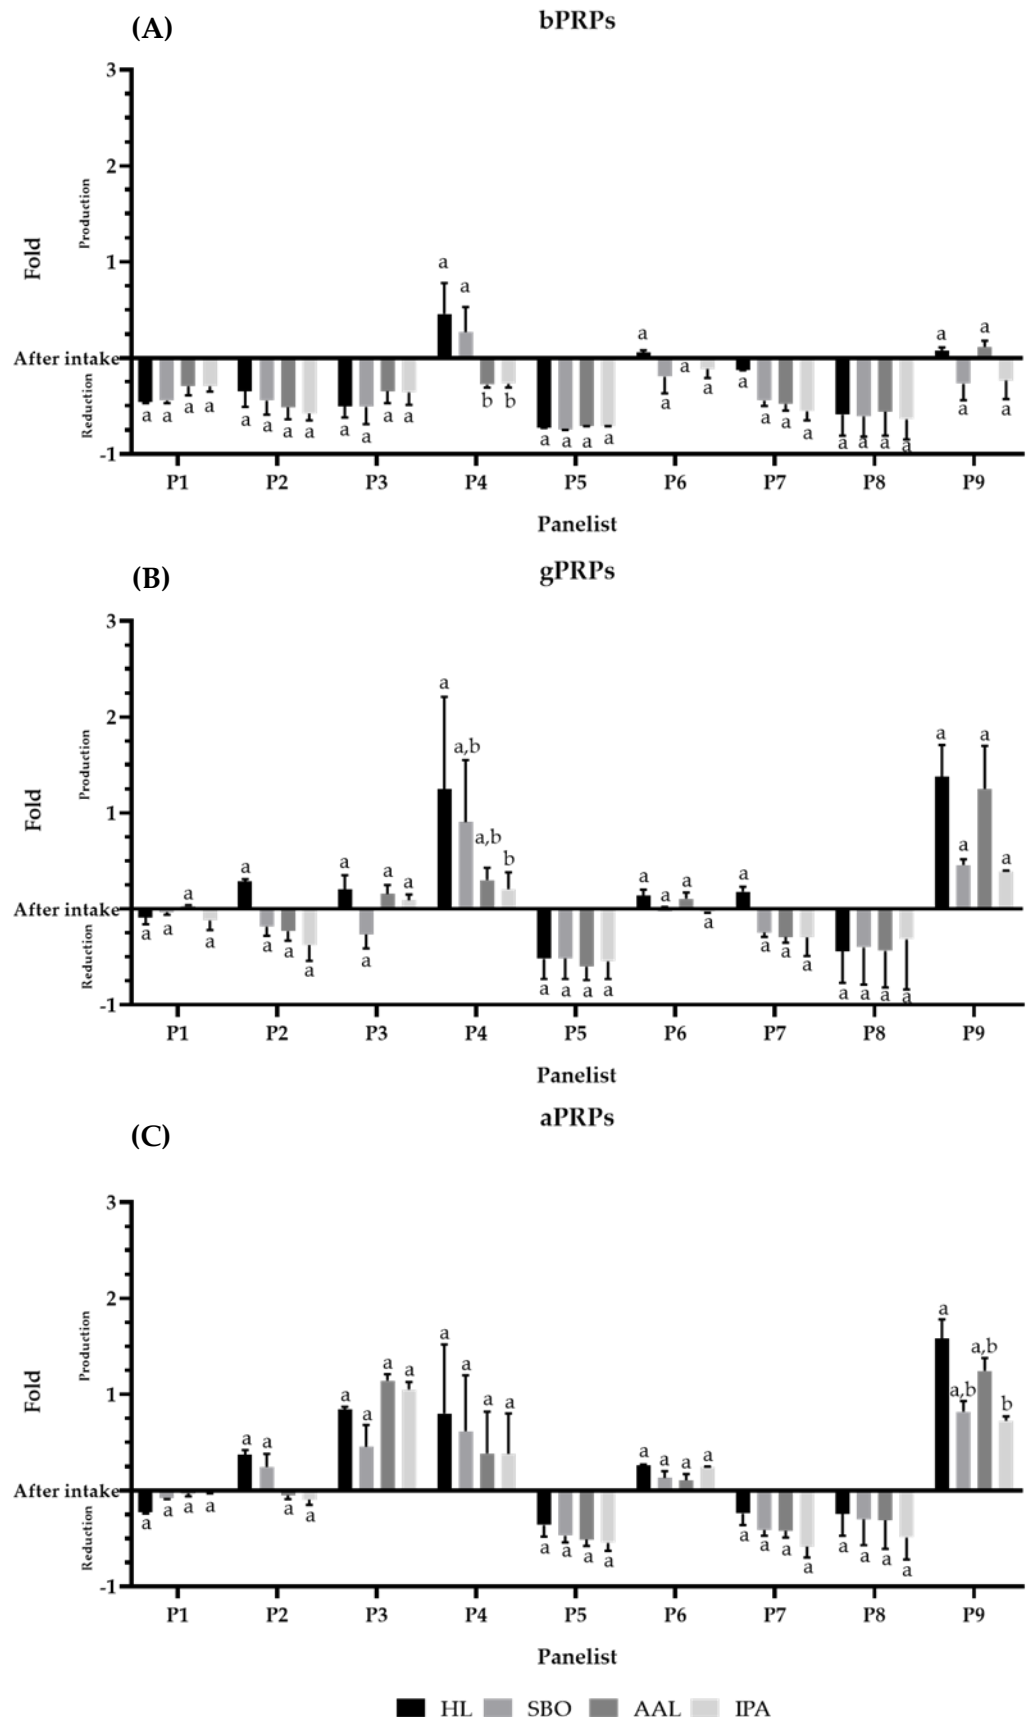

**Figure S2.** Proline-rich proteins (PRPs; A. bPRPs, B. gPRPs, and C. as aPRPs) family behavior after intake of each beer, where Coruja Hoppy Lager (HL), Super Bock Original (SBO), Coruja American Amber Lager (AAL), and Coruja India Pale Ale (IPA), respectively. The interaction between the PRPs and PC compounds is presented by the fold of each PRP precipitated, for each panelist, during beer sensorial analysis. Fold represents how many times occurs SP reduction or production regarding to the previous beer intake of saliva collection for each panelist. Values with different letters within each panelist are significantly different at  $p < 0.05$ .

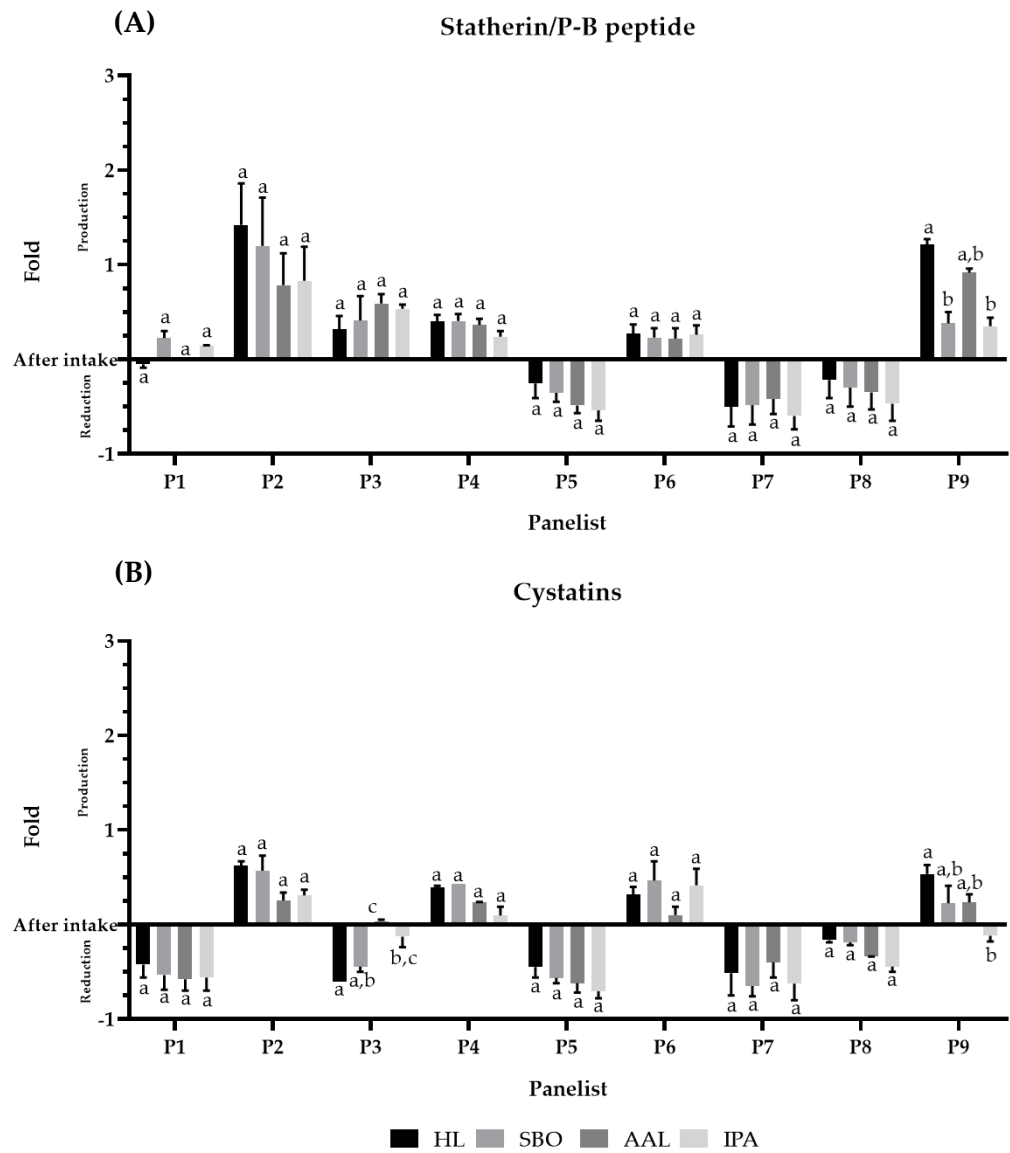

**Figure S3.** (A) Statherin / P-B peptide and (B) Cystatins behavior after intake of each beer, where Coruja Hoppy Lager (HL), Super Bock Original (SBO), Coruja American Amber Lager (AAL), and Coruja India Pale Ale (IPA), respectively. The interaction between these SP and PC compounds is presented by the fold of each PRP precipitated, for each panelist, during beer sensorial analysis. Fold represents how many times occurs SP reduction or production regarding to the previous beer intake of saliva collection for each panelist. Values with different letters within each panelist are significantly different at  $p < 0.05$ .
